# Supplementary material
Source: PubMed Central journal article supplement (PMC7158937)
Supplement: mmc1.pdf [file mmc1.pdf]

# THE LANCET

## Supplementary appendix

This appendix formed part of the original submission. We post it as supplied by the authors.

Supplement to: Ebrahim SH, Memish ZA. COVID-19: preparing for superspreader potential among Umrah pilgrims to Saudi Arabia. *Lancet* 2020; published online Feb 27. [http://dx.doi.org/10.1016/S0140-6736\(20\)30466-9](http://dx.doi.org/10.1016/S0140-6736(20)30466-9).

|                          | Reported<br>COVID-19<br>cases,<br>February 26,<br>2020 | Number of Umrah<br>Visa Pilgrims in<br>2019 |
|--------------------------|--------------------------------------------------------|---------------------------------------------|
| India                    | 3                                                      | 706,712                                     |
| Egypt                    | 1                                                      | 294,894                                     |
| Malaysia                 | 22                                                     | 269,085                                     |
| UK                       | 9                                                      | 78,215                                      |
| Iraq                     | 1                                                      | 61,455                                      |
| Afghanistan              | 1                                                      | 54,605                                      |
| United States of America | 35                                                     | 34,470                                      |
| Sri Lanka                | 1                                                      | 26,219                                      |
| France                   | 12                                                     | 24,239                                      |
| Thailand                 | 35                                                     | 17,959                                      |
| Singapore                | 90                                                     | 15,444                                      |
| Canada                   | 9                                                      | 13,342                                      |
| Germany                  | 16                                                     | 11,586                                      |
| Russian Federation       | 2                                                      | 8,436                                       |
| Australia                | 22                                                     | 4,153                                       |
| Sweden                   | 1                                                      | 3,104                                       |
| Italy                    | 299                                                    | 2,491                                       |
| Philippines              | 3                                                      | 2,777                                       |
| Spain                    | 2                                                      | 2,028                                       |
| Belgium                  | 1                                                      | 1,103                                       |
| China                    | 77,780                                                 | 879                                         |
| Cambodia                 | 1                                                      | 236                                         |
| Iran                     | 61                                                     | 32                                          |
| Japan                    | 157                                                    | 0                                           |
| Republic of Korea        | 977                                                    | 0                                           |
| Viet Nam                 | 16                                                     | 0                                           |
| Nepal                    | 1                                                      | 0                                           |
| Finland                  | 1                                                      | 0                                           |
| United Arab Emirates     | 13                                                     | Visa free                                   |
| Bahrain                  | 6                                                      | Visa free                                   |
| Kuwait                   | 3                                                      | Visa free                                   |
| Oman                     | 2                                                      | Visa free                                   |

Table: Umrah pilgrim volume in 2019 from countries reporting SARS-CoV-2
